# Supplementary material for: Highly efficient electrochemical ammonia synthesis via nitrogen reduction reactions on a VN nanowire array under ambient conditions
Source: Royal Society of Chemistry journal article supplement (doi:10.1039/c8cc00459e), 2018-01-01
Supplement: c8cc00459e1.pdf [file c8cc00459e1.pdf]

## Electronic Supplementary Information

### Experimental section

**Materials:**  $V_2O_5$ ,  $H_2C_2O_4 \cdot 2H_2O$ , urea,  $N_2H_4 \cdot H_2O$  and  $C_2H_5OH$  were bought from Beijing Chemical Corporation.  $p-C_9H_{11}NO$ ,  $C_7H_6O_3$ ,  $C_6H_5Na_3O_7 \cdot 2H_2O$ , and  $C_5FeN_6Na_2O \cdot 2H_2O$  was purchased from Aladdin Ltd. (Shanghai, China). CC was provided by Hongshan District, Wuhan Instrument Surgical Instruments business. All the reagents were used as received. The water used throughout all experiments was purified through a Millipore system.

**Preparation of  $V_2O_5/CC$  and VN/CC:** The  $V_2O_5$  nanowire array precursor was synthesized by hydrothermal route. In a typical synthesis, the  $V_2O_5$  powders (100 mg) and oxalic acid ( $H_2C_2O_4 \cdot 2H_2O$ , 170 mg) were added into 25 mL distilled water under continuous stirring until a clear solution were formed. 60 mg urea and 5 mL ethylene glycol were added with stirring 30 min, and then transferred into 50 mL Teflon-lined stainless steel autoclave liners with a piece of CC. The autoclave was maintained at 180 °C for 12 h, and then allowed to cool down. The CC with precursor was washed with deionized water several times and dried in oven. The  $V_2O_5/CC$  was obtained by annealing in air at 350 °C for 2 h. To make VN/CC,  $V_2O_5/CC$  was placed in the furnace and heated to 800 °C with a heating speed of 5 °C  $min^{-1}$  under a flowing  $NH_3$  atmosphere. After reacting 3 h at 800 °C, the system was allowed to cool down to room temperature naturally still under a flowing  $NH_3$  atmosphere. Before measurement, VN/CC was immersed in 0.1 M HCl for 2 h to remove the  $NH_3$  on the surface of VN.

**Characterizations:** XRD measurements were performed using a LabX XRD-6100 X-ray diffractometer with Cu  $K\alpha$  radiation (40 kV, 30 mA) of wavelength 0.154 nm (SHIMADZU, Japan). SEM measurements were carried out on a XL30 ESEM FEG scanning electron microscope at an accelerating voltage of 20 kV. TEM images were collected on a Zeiss Libra 200FE transmission electron microscope operated at 200 kV. XPS measurements were performed using an ESCALABMK II X-ray photoelectron spectrometer with the exciting source of Mg.

**Electrochemical measurements:** Electrochemical measurements were performed with a CHI 660E electrochemical analyzer (CH Instruments, Inc., Shanghai) using a standard three-electrode system using VN/CC as working electrode, graphite rod as the counter electrode, and a saturated Ag/AgCl used as the reference electrode. Before measurement all potentials measured were calibrated to RHE using the following equation:  $E(\text{RHE}) = E(\text{Ag/AgCl}) + 0.059 \times \text{pH} + 0.197$  (V). Polarization curves were obtained using linear sweep voltammetry with a scan rate of  $20 \text{ mV s}^{-1}$  and were the steady-state ones after several cycles. All experiments were carried out at room temperature ( $\sim 25 \text{ }^\circ\text{C}$ ). For  $\text{N}_2$  reduction experiments, the HCl electrolyte was purged with  $\text{N}_2$  for 30 min before the measurement. Potentiostatic test was conducted in  $\text{N}_2$  saturated 0.1 M HCl solution (30 mL) in a two-compartment cell, which was separated by Nafion membrane.

**Determination of ammonia:** Concentration of produced ammonia was spectrophotometrically determined by the indophenol blue method. In detail, 2 mL the electrolyte was removed from the electrochemical reaction vessel, and added into 2 mL 1.0 M NaOH solution containing salicylic acid and sodium citrate. And then, 1 mL 0.05 M NaClO and 0.2 mL 1 wt %  $\text{C}_5\text{FeN}_6\text{Na}_2\text{O}$  were also added into the above solution. After standing at room temperature for 2 h, the UV-Vis absorption spectrum was measured. The concentration of indophenol blue was determined using the absorbance at wavelength of 655 nm. The concentration-absorbance curves were calibrated using standard ammonia chloride solution with a series of concentrations. The fitting curve ( $y = 0.365x + 0.083$ ,  $R^2=0.999$ ) shows good linear relation of absorbance value with  $\text{NH}_3$  concentration by three times independent calibrations.

**Determination of hydrazine:** The hydrazine present in the electrolyte was estimated by the method of Watt and Chrisp. A mixture of p- $\text{C}_9\text{H}_{11}\text{NO}$  (5.99 g), HCl (concentrated, 30 mL) and  $\text{C}_2\text{H}_5\text{OH}$  (300 mL) was used as a color reagent. In detail, 5 mL electrolyte was removed from the electrochemical reaction vessel, and added into 5 mL above prepared color reagent, then standing 10 min at room temperature. The absorbance of the resulting solution was measured at 455 nm. The concentration-absorbance curves were calibrated using standard  $\text{N}_2\text{H}_4 \cdot \text{H}_2\text{O}$  solution with a series

of concentrations. The fitting curve ( $y = 0.575x + 0.035$ ,  $R^2=0.999$ ) shows good linear relation of absorbance value with  $N_2H_4$  concentration by three times independent calibrations.

**Faradaic efficiency:** The rate of ammonia formation was firstly calculated using the following equation:  $v_{NH_3} = (c_{NH_3} \times V)/(17 \times t \times A)$ , Where  $c_{NH_3}$  is the measured  $NH_3$  concentration,  $V$  is the volume of electrolyte,  $t$  is the reduction reaction time and  $A$  is the effective area of the cathode. Assuming three electrons were needed to produce one  $NH_3$  molecule, the Faradaic efficiency can be calculated as follows: Faradaic efficiency =  $(3F \times c_{NH_3} \times V)/(17 \times Q)$ , where  $F$  is the Faraday constant and  $Q$  is the quantity of applied electricity.

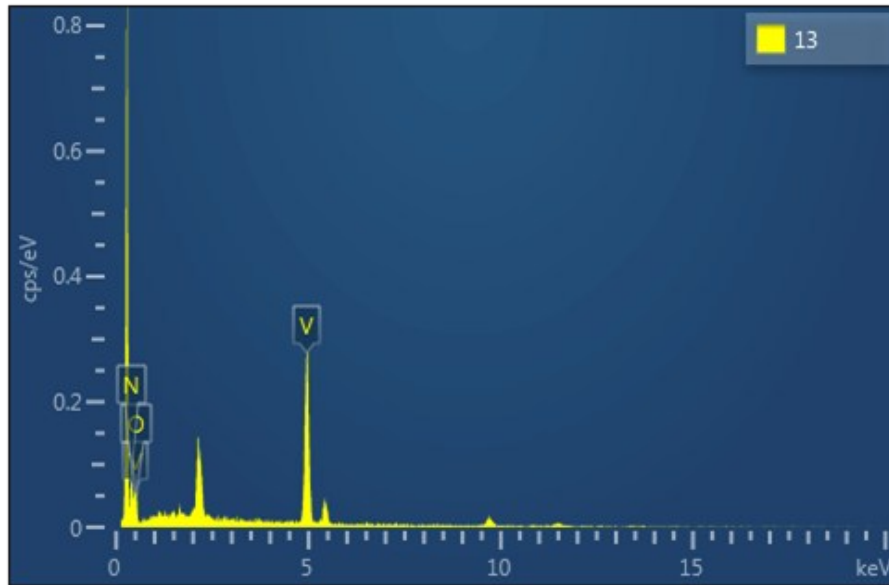

**Fig. S1.** EDX spectrum of VN/CC.

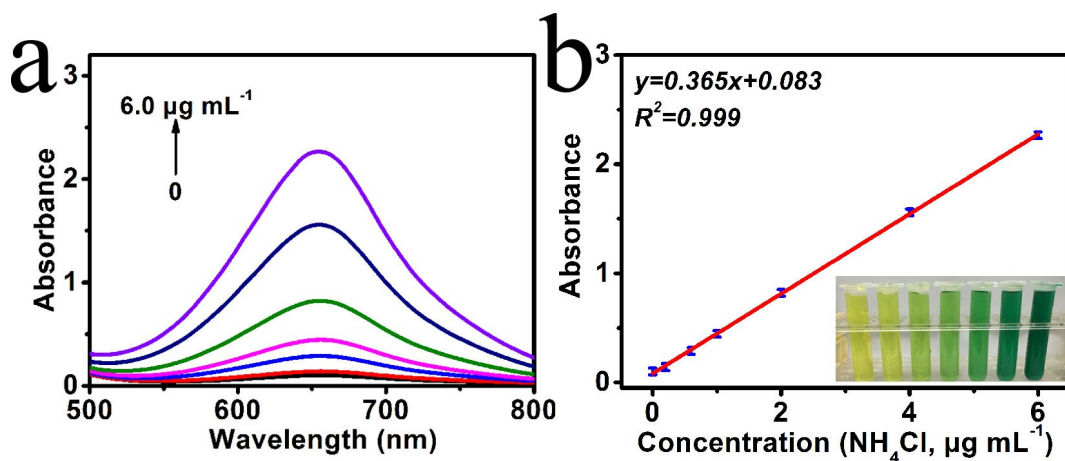

**Fig. S2.** (a) UV-Vis absorption spectra of indophenol assays with  $\text{NH}_4^+$  ions after incubated for 2 h at room temperature. (b) Calibration curve used for estimation of  $\text{NH}_3$  by  $\text{NH}_4^+$  ion concentration.

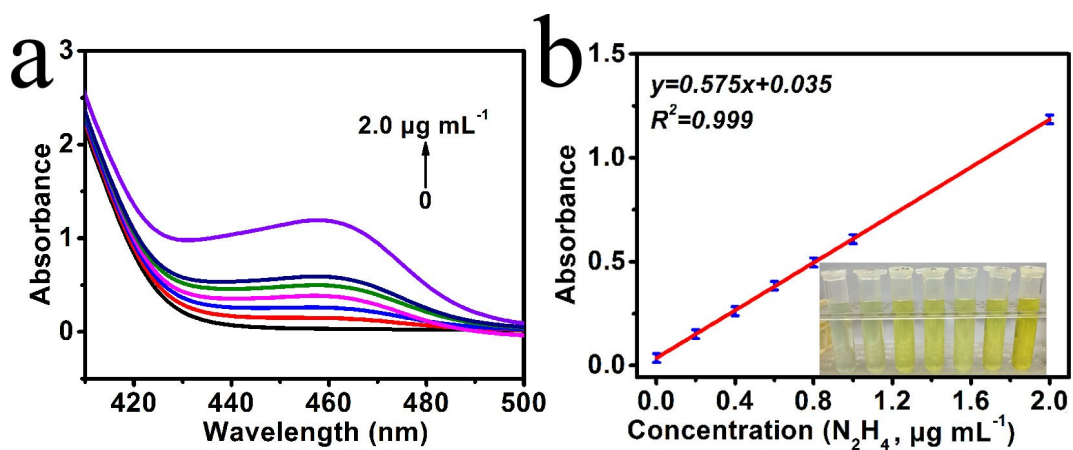

**Fig. S3.** (a) UV-Vis absorption spectra of various  $N_2H_4 \cdot H_2O$  concentrations after incubated for 10 min at room temperature. (b) Calibration curve used for estimation of  $N_2H_4$  concentration.

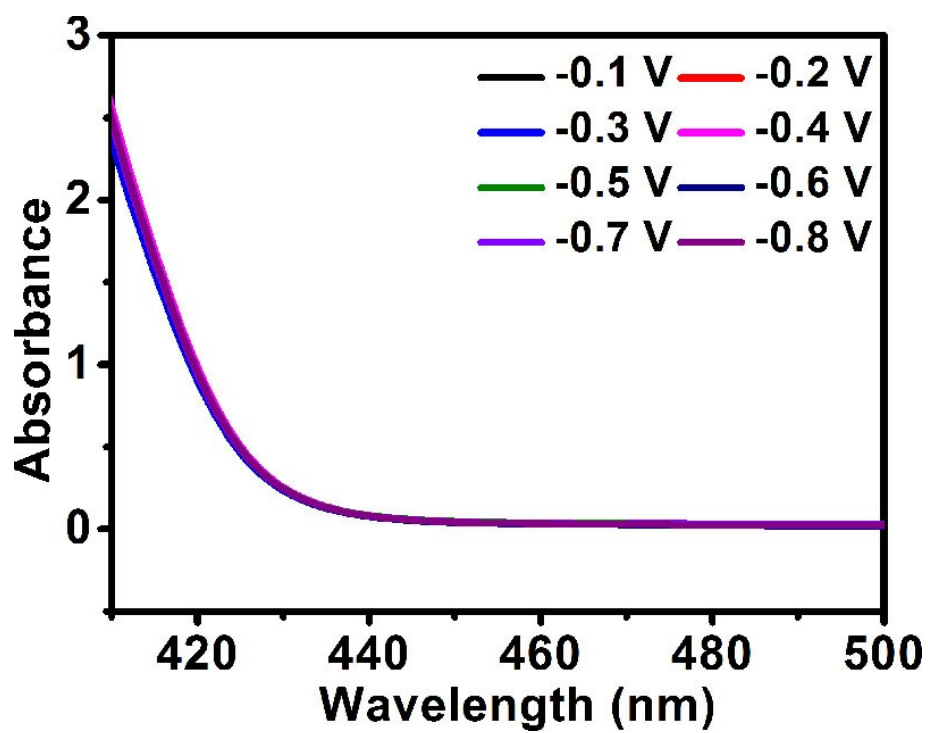

**Fig. S4.** (a) UV-Vis absorption spectra of the electrolytes stained with indophenol indicator after VN/CC electrolysis at different potentials for 3 h.

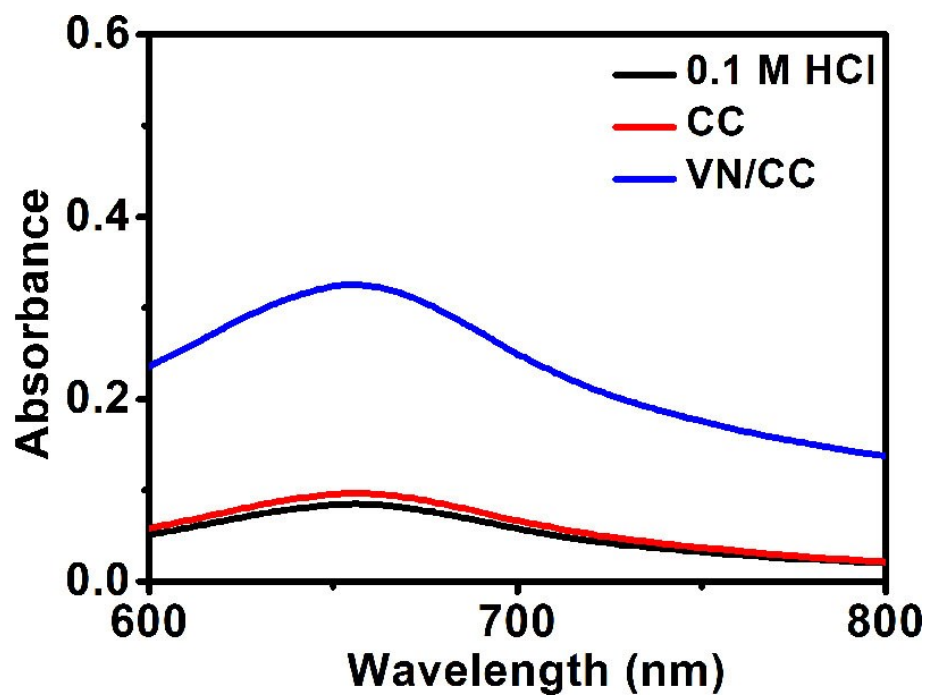

**Fig. S5.** (a) UV-Vis absorption spectra of the electrolytes stained with indophenol indicator before and after 3 h electrolysis at -0.3 V versus RHE at room temperature.



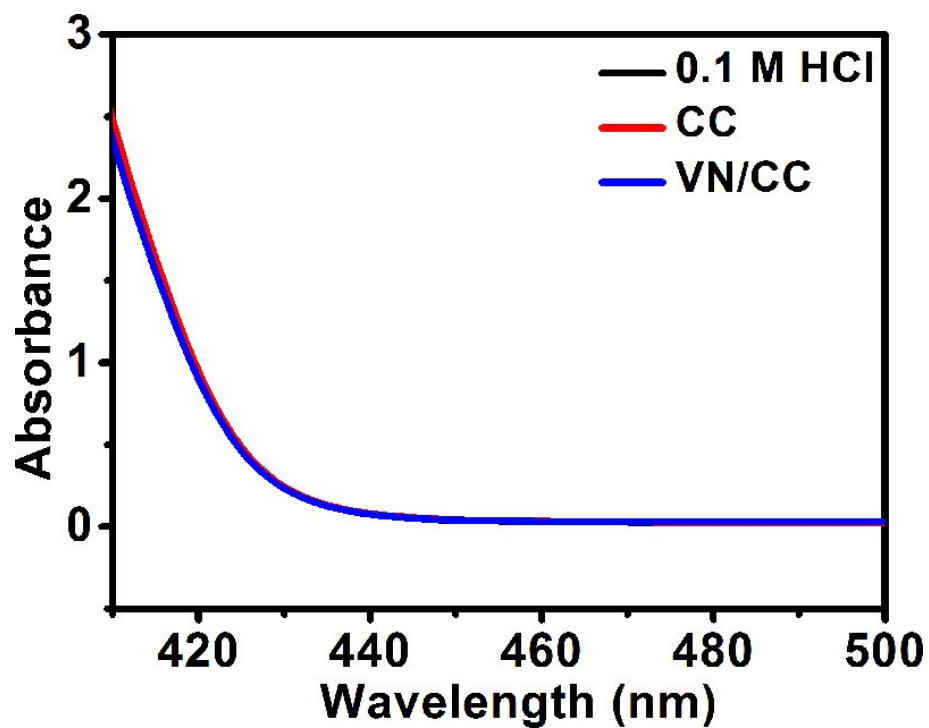

**Fig. S6.** (a) UV-Vis absorption spectra of the electrolytes estimated by the method of Watt and Chrisp before and after 3 h electrolysis in N<sub>2</sub> atmosphere at -0.3 V versus RHE at room temperature.

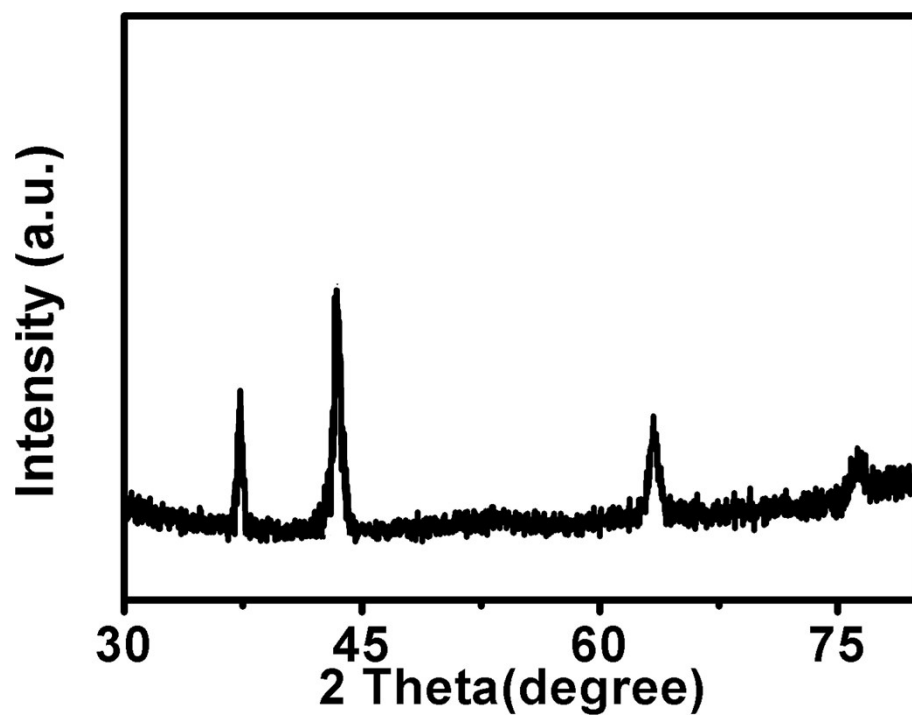

Fig. S7. The XRD pattern of VN after test.

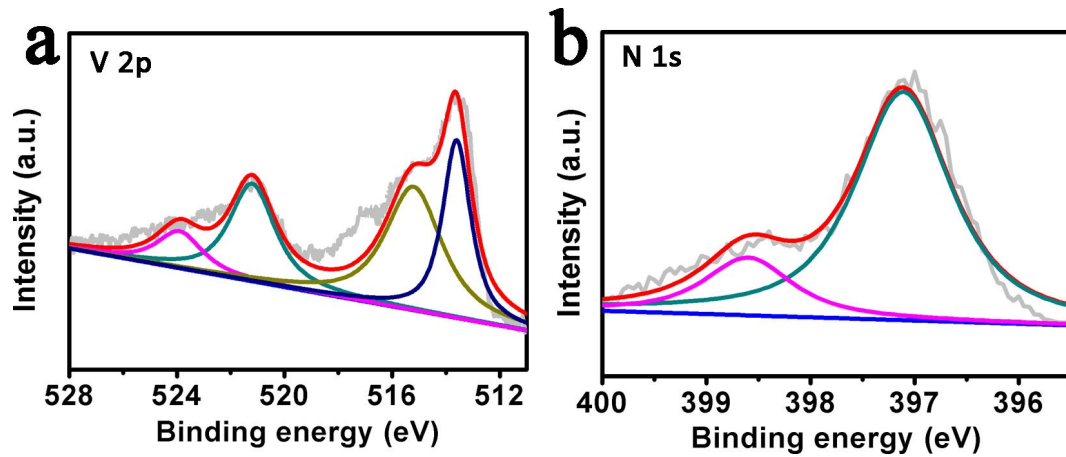

**Fig. S8.** XPS spectra of VN in the (a) V 2p and (b) N 1s regions after test.
